1 **Intraspecific genetic variation underlying postmating reproductive barriers between species**  
2 **in the wild tomato clade (*Solanum sect. Lycopersicon*)**

3

4

5 Cathleen P Jewell<sup>1,4</sup>, Simo Zhang<sup>1,5</sup>, Matthew J. S. Gibson<sup>1,6</sup>, Alejandro Tovar-Méndez<sup>2,7</sup>, Bruce  
6 McClure<sup>3,8</sup>, and Leonie C Moyle<sup>1,9</sup>

7

8 Addresses and email

9 <sup>1</sup>Department of Biology, Indiana University, Bloomington, IN, 47405, USA

10 <sup>2</sup>Elemental Enzymes, 1685 Galt Ind. Blvd., St. Louis, MO 63132, USA

11 <sup>3</sup>Department of Biochemistry, University of Missouri, Columbia, MO 65211, USA

12 <sup>4</sup>Email: [cpj.jewell@gmail.com](mailto:cpj.jewell@gmail.com)

13 <sup>5</sup>Email: [svm.zhang@gmail.com](mailto:svm.zhang@gmail.com)

14 <sup>6</sup>Email: [gibsomat@indiana.edu](mailto:gibsomat@indiana.edu)

15 <sup>7</sup>Email: [alejandro@elementalenzymes.com](mailto:alejandro@elementalenzymes.com)

16 <sup>8</sup>Email: [mcclureb@missouri.edu](mailto:mcclureb@missouri.edu)

17 <sup>9</sup>Email: [lmoyle@indiana.edu](mailto:lmoyle@indiana.edu)

18

19 Running title: Intraspecific variation for postmating isolation

20

21 Keywords: QTL, self-incompatibility, speciation, tomato, unilateral incompatibility

22 **Abstract**

23

24 A goal of speciation genetics is to understand how the genetic components underlying  
25 interspecific reproductive barriers originate within species. Unilateral incompatibility (UI) is a  
26 postmating prezygotic barrier in which pollen rejection in the female reproductive tract (style)  
27 occurs in only one direction of an interspecific cross. Natural variation in the strength of UI has  
28 been observed among populations within species in the wild tomato clade. In some cases,  
29 molecular loci underlying self-incompatibility (SI) are associated with this variation in UI, but the  
30 mechanistic connection between these intra- and inter-specific pollen rejection behaviors is  
31 poorly understood in most instances. We generated an F<sub>2</sub> population between SI and SC  
32 genotypes of a single species, *Solanum pennellii*, to examine the genetic basis of intraspecific  
33 variation in the strength of UI against other species, and to determine whether loci underlying  
34 SI are genetically associated with this variation. We found that F<sub>2</sub> individuals vary in the rate at  
35 which UI rejection occurs. One large effect QTL detected for this trait co-localized with the SI-  
36 determining *S*-locus. Moreover, individuals that expressed *S*-RNase—the *S*-locus protein  
37 involved in SI pollen rejection—in their styles had much more rapid UI responses compared to  
38 those without *S*-RNase protein. Our analysis shows that intraspecific variation at mate choice  
39 loci—in this case at loci that prevent self-fertilization—can contribute to variation in the  
40 strength of interspecific isolation, including postmating prezygotic barriers. Understanding the  
41 nature of such standing variation can provide insight into the accumulation of these barriers  
42 between diverging lineages.

43

44 **Key Words:** self-compatibility, QTL, reproductive isolation, postmating prezygotic, unilateral  
45 incompatibility, *S*-locus

46

## 47 Introduction

48  
49 Speciation involves the accumulation of genetic differences and—in sexually  
50 reproducing organisms—reproductive isolation, among diverging lineages. Accordingly, loci that  
51 contribute to this cumulative process between species must first arise within an individual  
52 population prior to spreading to other conspecific populations within their own lineage. During  
53 this process, populations of a single species are expected to show varying strengths of  
54 reproductive isolation against other lineages; that is, there will be intraspecific genetic variation  
55 for the magnitude of interspecific reproductive isolation from other lineages. Intraspecific  
56 phenotypic variation in the strength of hybrid incompatibility has been observed in many  
57 systems including mammals (Good, Handel and Nachman, 2007; Vyskočilová, Pražanová and  
58 Piálek, 2009), arthropods (Bordenstein, Drapeau and Werren, 2000; Kopp and Frank, 2005;  
59 Reed and Markow, 2004; Shuker, *et al.*, 2005), nematodes (Kozłowska, *et al.*, 2012) and plants  
60 (Case and Willis, 2008; Leppälä and Savolainen, 2011; Martin and Willis, 2010; Rieseberg, 2000;  
61 Sweigart, Mason and Willis, 2007). Understanding the nature, origin, and accumulation of this  
62 variation, including the underlying molecular genetic variants responsible, can provide insight  
63 into the evolutionary dynamics of lineage divergence (Cutter, 2012), including the order in  
64 which alleles contributing to interspecific reproductive isolation arise and fix within diverging  
65 lineages.

66  
67 The genetic basis of intraspecific variation for interspecific barriers has been  
68 investigated in few cases, most of which focus on postzygotic isolating barriers. Some of these  
69 studies have confirmed that variable reproductive isolation is due to genetic variation between  
70 populations of a species, but have not identified the specific loci or gene(s) responsible [e.g.  
71 (Kozłowska, *et al.*, 2012; Machado, Haselkorn and Noor, 2007)]. In other cases, isolation  
72 variation has been mapped to localized chromosomal regions (quantitative trait loci, or QTL) or  
73 even individual loci, whose geographic distribution is then investigated. For example, between  
74 the plant sister species *Mimulus nasutus* and *M. guttatus*, the *M. guttatus* hybrid male sterility  
75 1 (*hms1*) allele interacts with the *M. nasutus* *hms2* allele to cause male sterility in hybrids; the  
76 *M. nasutus* *hms2* allele is common across populations, but the interacting *hms1* allele is  
77 geographically restricted within *M. guttatus* (Martin and Willis, 2010; Sweigart, *et al.*, 2007;  
78 Zwellig and Sweigart 2018a, b). This and other studies of hybrid sterility and inviability (e.g.,  
79 Leppälä and Savolainen, 2011; Reed and Markow, 2004; Shuker, *et al.*, 2005) confirm that  
80 variation in the strength of interspecific isolation between populations within species can be  
81 due to standing genetic variation.

82  
83 Compared to these studies of variable postzygotic isolating barriers, fewer analyses  
84 address within-species polymorphism for prezygotic reproductive isolation [for an exception,  
85 see (Hopkins and Rausher, 2012)]. Because prezygotic barriers act earlier in reproduction, they  
86 could have a much larger role than postzygotic barriers in restricting levels of gene flow  
87 between closely related species (Lowry, *et al.*, 2008; Rieseberg and Willis, 2007). Of these,  
88 postmating prezygotic interactions can be particularly important for reproductive isolation  
89 when species are only weakly isolated by other prezygotic mechanisms, such as pollinator  
90 isolation [reviewed in (Swanson, Edland, and Pruess 2004; Moyle, Jewell and Kostyun, 2014)].

91  
92 Unilateral incompatibility (UI) is an example of a postmating prezygotic isolating barrier  
93 that shows variation in strength among populations within species. In plants, this barrier  
94 manifests after pollen transfer, as the (male) pollen grains germinate and produce pollen tubes  
95 that grow down the female reproductive tract (the ‘pistil’, composed of the stigma (the pollen  
96 receiving site), the ovary, and the style which connects them) towards individual ovules. UI  
97 occurs between species when pollen rejection in the female style occurs in only one direction of  
98 an interspecific cross (and is therefore ‘unilateral’; de Nettancourt, 1977; Lewis and Crowe,  
99 1958), while the reciprocal cross results in pollen tubes successfully growing down the style and  
100 into the ovary. UI often follows an ‘SI x SC rule’ in which genetically self-incompatible (SI)  
101 species reject pollen from self-compatible (SC) species but the reciprocal cross is successful (de  
102 Nettancourt, 1977; Lewis and Crowe, 1958; Murfett, *et al.*, 1996); however, there are  
103 exceptions to this rule even within species (Baek, *et al.*, 2015). In the wild tomato clade, species  
104 that are largely SI and display strong UI responses can nevertheless include SC populations that  
105 exhibit weakened UI. In some species, the UI response is less rapid in SC populations, but in  
106 other species, SC populations fail to reject heterospecific pollen altogether (i.e. UI is lost in  
107 these populations) (Baek, *et al.*, 2015, and see Discussion).

108  
109 These observations suggest that among-population variation in the strength of  
110 interspecific UI might be mechanistically associated with molecular factors contributing to SI (Li  
111 and Chetelat, 2015; Tovar-Méndez, *et al.*, 2014). However, the extent to which UI and SI are  
112 consistently genetically associated remains unclear. Within the plant family Solanaceae, a  
113 primary determinant of gametophytic self-incompatibility is the *S*-locus (McClure, Cruz-Garcia  
114 and Romero, 2011; McClure, *et al.*, 1989) which encodes at least two proteins responsible for  
115 the self-rejection mechanism: an *S*-RNase protein (the stylar component) that recognizes one or  
116 more pollen-expressed F-box protein(s) in germinated pollen tubes and arrests pollen tube  
117 growth within the style (Kubo, *et al.*, 2015; Kubo, *et al.*, 2010; Li and Chetelat, 2015; Sijacic, *et*  
118 *al.*, 2004; Williams, *et al.*, 2014). Pollen is rejected when a haploid pollen tube bears an *S*-  
119 haplotype that is identical one of the *S*-haplotypes of the pistil (maternal) parent (McClure, *et*  
120 *al.*, 1989). Loss of SI in the wild tomato clade is frequently associated with mutations in the  
121 locus producing *S*-RNase (Bedinger, *et al.*, 2011; Igic, Lande and Kohn, 2008; Rick and Chetelat,  
122 1991). Similarly, within predominantly SI species, population-level transitions to SC are also  
123 often associated with the loss of *S*-RNase function. Within the two wild tomato species *S.*  
124 *habrochaites* and *S. pennellii*, for example, several SC populations have been shown to lack *S*-  
125 RNase expression in stylar tissue (Kondo *et al.* 2002). Despite the loss of *S*-RNase, however,  
126 most SC populations of these wild species still exhibit UI against interspecific pollen, indicating  
127 UI can also have *S*-RNase-independent mechanisms. Nonetheless, the degree to which natural  
128 intraspecific variation in genes involved in SI might simultaneously affect interspecific isolation  
129 via UI remains to be directly investigated in most cases (but see Broz *et al.* 2017, Markova *et al.*  
130 2016).

131  
132 In this study, we generated an F<sub>2</sub> mapping population between two populations within a  
133 single species to map QTL underlying variation in the strength of UI against a second, tester,  
134 species. Our two parental genotypes were drawn from an SI population (*S. pennellii* accession

135 LA3778) and a conspecific SC population (*S. pennellii* accession LA0716) which has recently lost  
136 SI; both these genotypes express UI, but differ in how fast they reject pollen from domesticated  
137 tomato pollen and other SC species (*Results*). Our goal was to determine the genetic basis of  
138 this standing variation for the rate of UI rejection within our target species, and its association  
139 with molecular loci underlying SI. We quantified UI response, evaluated SI status, and measured  
140 several floral and fertility traits in the recombinant F<sub>2</sub> population. We assessed 1) the number of  
141 large effect QTL that contribute to variation in the UI response within *S. pennellii*, 2) the  
142 association, if any, between these UI loci and *a priori* candidate loci known to contribute to  
143 intraspecific SI variation, and 3) the degree of association, if any, between UI phenotypes and  
144 floral or fertility traits. These data allow us to assess whether the strength of UI (and changes in  
145 SI status) in different intraspecific *Solanum* lineages is due to changes at the same underlying  
146 loci.

147

## 148 **Materials and Methods**

149

### 150 *Generating the F<sub>2</sub> population*

151 The wild tomato clade, *Solanum* sect. *Lycopersicon* is a group within the diverse  
152 nightshade family *Solanaceae* that consists of 13 closely related [ $<2.5$  MY old; (Pease, *et al.*,  
153 2016; Peralta, Spooner and Knapp, 2008; Rodriguez, *et al.*, 2009)] hermaphroditic species,  
154 including the domesticated tomato and its wild relatives (Peralta, *et al.*, 2008). In this study our  
155 focal species was *Solanum pennellii*, a wild, herbaceous, perennial species (**Supplementary**  
156 **Figure 1**). *S. pennellii* populations-- including the two parental accessions (populations) used  
157 here (see below)--can vary in the strength of UI against other SC *Solanum* species (Liedl,  
158 McCormick and Mutschler, 1996). We generated a recombinant F<sub>2</sub> population in which the  
159 female parent was from self-compatible *S. pennellii* accession LA0716, and the male parent was  
160 from self-incompatible *S. pennellii* accession LA3778. LA0716 does not express *S-RNase*, likely  
161 due to a deletion in the underlying gene (Li and Chetelat, 2015), however both accessions  
162 exhibit UI against other SC species, including domesticated tomato.

163

164 Seeds of the parental accessions were obtained from the Tomato Genomics Resource  
165 Center (TGRC; [tgrc.ucdavis.edu](http://tgrc.ucdavis.edu)), grown to maturity and one individual from each accession was  
166 chosen to make the original cross. The F<sub>1</sub> offspring of this cross were self-compatible and one F<sub>1</sub>  
167 was selfed by hand-pollination to generate the F<sub>2</sub> generation (n = 100). To cultivate all  
168 experimental plants, seeds were treated with 50% bleach for 30 minutes, rinsed, placed on  
169 moist blotting paper and incubated (12hr day-length, 24°C) to stimulate germination.  
170 Germinated seedlings were transplanted into flats with Metro Mix 360 (Sun Gro) potting mix  
171 and hand watered daily. Once well-established, the seedlings were transferred to individual 1-  
172 gallon pots containing 50% Metro Mix 360 and 50% Indiana University (IU) greenhouse potting  
173 mix; pots were placed in a climate controlled greenhouse at IU with 14hr day-length. Plants  
174 were watered twice daily, fertilized weekly, staked prior to flowering, and regularly pruned  
175 thereafter.

176

### 177 *Quantifying unilateral incompatibility*

178 To assess the quantitative expression of interspecific UI, each  $F_2$  was pollinated with the  
179 same tester genotype of *S. lycopersicum* (accession LA3475, SC). While both SC LA0716 and SI  
180 LA3778 reject *S. lycopersicum* pollen, the former has a slower UI response (i.e. the pollen is  
181 halted after growing further down the style; *Results*). At least 3 flowers from each  $F_2$  individual  
182 were emasculated one day prior to anthesis, the styles pollinated 24hrs later, and collected  
183 after an additional 24hrs, which is sufficient time for compatible (i.e., conspecific) pollen tubes  
184 to reach the ovary in the parental genotypes. Styles were fixed in 3:1 ethanol:glacial acetic acid,  
185 stained using aniline blue fluorochrome (Biosupplies Australia Pty Ltd) and imaged using  
186 fluorescent microscopy. Because styles were too long to be captured in one image frame,  
187 several images were taken along the axis of each style and then stitched (Autostitch; (Brown  
188 and Lowe, 2007)). Stitched images were visualized for data collection using ImageJ (Abramoff,  
189 Magalhaes and Ram, 2004). UI response (location of pollen rejection within the style) was  
190 quantified by measuring the total style length, length of the five longest pollen tubes, and  
191 length of the pollen tube “front” where the majority of pollen tubes stopped growing. In all  
192 analyses reported here, UI response was calculated by dividing the average of the five longest  
193 pollen tubes by the total length of the style. Thus, mean pollen tube growth is quantified as a  
194 proportion of style length travelled and varies from 0 (representing no growth down the style)  
195 to 1 (where pollen tubes reach the end of the style). UI was similarly quantified in the parents  
196 and  $F_1$  as described above.

197

#### 198 *Evaluating self-incompatibility status*

199 In gametophytic SI, complete pollen rejection only occurs if both *S*-haplotypes in the  
200 pistil match both *S*-haplotypes in the pollen parent. Because our  $F_2$  population was generated  
201 by self-fertilization of one  $F_1$  individual, a simple SI/SC nomenclature cannot be applied to this  
202 population. Instead, we expected that  $F_2$ s would display ‘acceptor’ phenotypes, as they would  
203 have at most one functional *S*-haplotype from the original SI parent. For example, here, if the  
204 LA3778 parent is designated  $S_1S_2$  and the LA0716 parent  $S_0S_0$ , their  $F_1$  could be  $S_1S_0$  or  $S_2S_0$ .  
205 During self-fertilization of a particular  $F_1$  individual (e.g.,  $S_1S_0$ ), pollen bearing the LA3778 (SI  
206 parent)  $S_1$ -haplotype will be selectively arrested, leaving only pollen with LA0716 (SC parent)  $S_0$ -  
207 haplotype to fertilize the  $F_1$  ovules; the resulting  $F_2$  individuals are therefore expected to be  
208 either  $S_1S_0$  or  $S_0S_0$ , and none should completely reject pollen from either SI or SC parent (i.e.  
209 they are ‘acceptors’). To confirm this was the case, we evaluated the pollen-rejection status of  
210 individuals in several ways. To initially test self-fertility status, at least three flowers from each  
211  $F_2$  individual were manually self-pollinated. Selfed  $F_2$ s that produced fruits were designated as  
212 acceptor phenotypes. Fruits from these pollinations were left to mature on the plant; at  
213 maturity each was weighed and measured (length and width), and seeds extracted by hand to  
214 count viable seeds per fruit. In the rare cases (i.e., three individuals) where no fruits were  
215 produced from these initial hand-pollinations, individuals were provisionally designated as self-  
216 sterile. These individuals were further evaluated using pollen from the original SI LA3778 parent  
217 used to generate the  $F_2$ , first by evaluating fruit set following pollination and then by directly  
218 assessing pollen rejection by visualizing pollen tube growth in styles. The latter experiments  
219 were performed as for UI (see ‘Quantifying unilateral incompatibility’ above), except that the  
220 tester pollen came from the LA3778 parent. The  $F_1$  was evaluated for self-fertility/acceptor  
221 status in the same manner.



222

### 223 *Floral morphology and fertility traits*

224 To quantify additional reproductive traits that might be relevant to mating system  
225 variation or to the expression of UI, six floral and six fertility traits were measured. The six floral  
226 traits were: corolla diameter, style length, stigma exertion (distance between stigmatic surface  
227 to the tip of the anther cone, on an intact flower), anther length, ovary height, and ovary width  
228 [(Moyle, 2007); **Supplementary Figure 1**]. Using digital calipers, three fully open flowers (day 1  
229 of opening) per F<sub>2</sub> individual were measured for all floral traits, and replicate measures  
230 averaged within each individual prior to analyses. For each parent individual and the F<sub>1</sub>, five  
231 replicate flowers were similarly measured. For overall comparison of the two parental  
232 accessions, floral traits were also quantified on five additional individuals from each accession,  
233 by taking the average of measurements from three flowers per individual.

234

235 For fertility traits, we quantified total pollen, proportion viable pollen, fruit weight, fruit  
236 width, fruit length, and seed set. Pollen number per flower was estimated by collecting whole  
237 anther cones from individual flowers one day before opening, into lactophenol aniline blue  
238 histochemical stain (Kearns and Inouye, 1993; Moyle and Graham, 2005). Each anther cone was  
239 homogenized and for each sample an aliquot of homogenate was examined on an inverted  
240 microscope using a hemacytometer, to count total pollen grains and estimate proportion of  
241 viable and inviable pollen. Pollen that fails to stain lacks functional cytoplasm and was classified  
242 as inviable. At least three anther cones were collected and counted per individual; mean counts  
243 for each individual were used for analysis. At least three selfed fruits per individual (where  
244 possible) were hand harvested, individually weighed, and bisected to take length and width  
245 measurements (see ‘Self-incompatibility status’ section above). All seeds were extracted and  
246 the number of viable seeds was counted per fruit. At least three fruit were measured per  
247 individual and trait means for each individual were used for analysis.

248

### 249 *Style Protein Expression*

250 Two loci (*S-RNase* and *HT*) were directly investigated for their association with UI  
251 phenotypic variation, by assessing their protein expression in parental, F<sub>1</sub>, and F<sub>2</sub> styles. Both  
252 S-RNase protein and HT (which is a small asparagine-rich protein (Covey, *et al.*, 2010; McClure,  
253 *et al.*, 1999; O’Brien M, 2002)) have been previously implicated in UI expression (Murfett *et al.*,  
254 1996, Tovar-Mendez *et al.*, 2014)—including in QTL mapping studies in other *Solanum* species  
255 (Bernacci and Tanksley, 1997)—making them *a priori* candidates for UI variation in this  
256 population. Both genes are also essential for SI (McClure, *et al.*, 1999). The *HT* gene was  
257 duplicated in the ancestor of *Solanum*, giving rise to two tandemly arrayed genes  
258 (Sopen12g029190, *HT-A* and Sopen12g029200, *HT-B*) on chromosome 12 (Covey *et al.* 2010). A  
259 subset of individuals (F<sub>1</sub> n = 1; F<sub>2</sub> n = 21) was screened for protein expression of S-RNase and HT  
260 using protein blotting. For each individual, flowers were emasculated 24hrs before opening;  
261 styles were collected 24hrs later and weighed. At least 5mg stylar tissue was collected per  
262 individual and protein was extracted using 2xLSB (Laemmli Sample Buffer; 10uL LSB / 1mg  
263 tissue). Samples were boiled 5min, centrifuged (10min at 20,000 x g) and the supernatant was  
264 retained for analysis. For S-RNase detection, extract equivalent to 0.2mg fresh weight per lane  
265 was separated in 10% Tris-Tricine SDS PAGE, blotted to PVDF, and immunostained (1:5000) with

266 an antibody against the conserved C2 S-RNase motif, as described previously (Covey, *et al.*,  
267 2010). For HT-protein detection, extracts equivalent to 1.5mg fresh weight were separated in  
268 12.5% Tris-Tricine SDS PAGE, blotted to PVDF, and immunostained (1:5000) with an affinity-  
269 purified antibody that recognizes both HT-A and HT-B proteins. The antibody was prepared  
270 against the synthetic peptide LEANEIHNTELNPTLQKKGGC-amide (21st Century Biochemicals),  
271 as described previously (Tovar-Méndez, *et al.*, 2017).

272

### 273 *Genotyping F<sub>2</sub>s*

274 To genotype our F<sub>2</sub> population, genomic DNA from 93 F<sub>2</sub>s and each parent was  
275 extracted using Qiagen DNeasy Plant Mini Kits. Extracted genomic DNA samples were sent to  
276 the Cornell University Institute of Biotechnology's Genomic Diversity Facility for genotyping-by-  
277 sequencing (GBS), using restriction enzyme PstI. An unfiltered SNP marker set was generated by  
278 the Cornell Institute of Biotechnology, by mapping trimmed raw sequence reads onto the *S.*  
279 *pennellii* (LA0716) genome (Bolger, *et al.*, 2014) using *bwa* (Li 2013), within the Cornell TASSEL  
280 3.0 GBS reference pipeline (version 3.0.173). To obtain a high-quality set of markers for the  
281 linkage map and QTL mapping, only markers with bi-allelic sites and that had fixed differences  
282 between parental genotypes were used. For consistency, we required that a maximum of 30%  
283 individuals differ in genotypes for any pair of markers that are within 500bp of each other, for  
284 these markers to be retained. Segregation distortion was assessed by testing for Hardy-  
285 Weinberg equilibrium at each marker, and markers showing significant deviation ( $p < 0.05$ )  
286 were removed from the final marker dataset. After implementing these filters and also  
287 removing samples with low sequencing quality (those that had more than 15% missing  
288 genotypes), the initial genetic map contained 810 markers and was significantly expanded  
289 (average LG length of 332 cM) likely due to unaccounted for genotyping errors. To  
290 accommodate this, we used the Genotype-Corrector tool (Miao *et al.*, 2018) which corrects or  
291 imputes genotype calls at reference-mapped markers based on a sliding-window algorithm,  
292 prior to rebuilding the linkage map. The resulting dataset contained 569 high-quality markers  
293 from 88 individuals; five additional individuals were removed due to high levels of missing data  
294 (>15%) following correction or removal of unlikely genotype calls.

295

### 296 *Linkage Map and QTL Mapping*

297 The linkage map was constructed using the Rqtl (Broman, *et al.*, 2003) and ASMap  
298 (Taylor & Butler, 2017) packages in R version 3.2.2 (R Core Team, 2015); ASMap implements the  
299 minimum spanning tree (MST) algorithm (Wu *et al.*, 2008) for map construction. Markers were  
300 first clustered by chromosome (based on reference mapping) prior to inferring the marker  
301 order on each group using the MST algorithm. The final map length was 1750.48cM (average of  
302 145.87 cM per LG), with an average of 0.276 cM between markers.

303

304 For phenotypes that were non-normally distributed (Shapiro-Wilk test;  $W < 0.05$ ), we  
305 transformed the trait data using the *nqrnk* function which transforms the vector of  
306 quantitative values to corresponding normal quantiles and preserves the mean and standard  
307 deviation. Missing genotypes were imputed prior to performing genome scans with the  
308 multiple QTL model [MQM; (Arends, *et al.*, 2010)] for each trait. Genome-wide significance LOD  
309 thresholds were calculated for each trait based on permutation tests (1000 iterations) with



310 alpha = 0.05. For each trait, we included the significant QTL in a model as the main effect to  
311 obtain estimates of the total phenotypic variation explained and individual contributions of  
312 each QTL, as well as to test for interactions between QTL. The percent parental difference  
313 explained (relative homozygous effect, RHE) was calculated for each detected QTL as the  
314 additive QTL effect size divided by the parental difference. We assessed overlap of identified  
315 QTL with previously identified UI QTL (Bernacci and Tanksley, 1997) by using information on  
316 physical location of markers, the annotated *S. lycopersicum* and *S. pennellii* genomes, and other  
317 gene position data from the Sol Genomics Network (solgenomics.net). Finally, we quantified the  
318 number of loci that fell within the 1.5-LOD confidence interval (CI) of our UI QTL (see Results) by  
319 identifying the two markers closest to each end of the CI and then counting all annotated genes  
320 that fell between these two markers, using version 2 of the AUGUSTUS annotation of the *S.*  
321 *pennellii* genome.

322

### 323 *Statistical Analyses*

324 All analyses were run in R version 3.2.2 (R Core Team, 2015) and statistical significance  
325 was reported if  $p < 0.05$ . Shapiro-Wilks tests were performed to test for normality for each  
326 quantitative trait. T-tests were used to test for trait variation between the parental accessions,  
327 and to compare UI responses between individuals found to express S-RNase protein or not.

328

## 329 **Results**

330

### 331 *Rapidity of unilateral incompatibility rejection response varies among F<sub>2</sub>s*

332 The two parental accessions used to make our F<sub>2</sub> population both exhibited UI but  
333 differed quantitatively in how rapidly they rejected *S. lycopersicum* pollen, i.e. in the position  
334 within the style that their UI response manifested. The SI LA3778 parent had a rapid UI  
335 response to heterospecific pollen tubes ( $0.038 \pm 0.005$  proportion of style length; **Figure 1**),  
336 where pollen rejection was defined in terms of the proportional distance of pollen tube growth  
337 down the style (so that values closer to zero indicate a rapid UI response whereas slower  
338 responses have values closer to 1). The SC LA0716 parent had a less rapid response ( $0.32 \pm 0.16$   
339 proportion of style length). The F<sub>1</sub> individual also expressed a rapid UI response ( $0.040 \pm 0.034$   
340 proportion of style length). All measured (n=99) F<sub>2</sub> individuals expressed UI. Nonetheless, there  
341 was broad quantitative variation in the rapidity of the UI rejection response, with the tester  
342 pollen tube growth response ranging from 0.01 – 0.55 of the length of F<sub>2</sub> styles (**Figure 1**).

343

### 344 *All F<sub>2</sub>s accepted self-pollen*

345 Because the F<sub>2</sub> population was generated by self-fertilization of one F<sub>1</sub> individual, we  
346 expected that all F<sub>2</sub>s would accept self-pollen. This is because only F<sub>1</sub> pollen bearing the LA0716  
347 (SC parent) S-haplotype would have fertilized F<sub>1</sub> ovules (due to pistil-mediated gametophytic  
348 selection against the alternative, functional, pollen-side allele from the LA3778 SI parent) (see  
349 Methods). We confirmed that all evaluated F<sub>2</sub> individuals (n = 94) accepted self-pollen  
350 ('acceptors' in **Figure 1**). In the few individuals (n = 3) that did not successfully develop fruits  
351 after self-fertilization, when pollen rejection was directly assessed in their styles, they showed  
352 no evidence of a pollen rejection response; that is, pollen tubes were observed growing all the  
353 way to the ovary. Therefore we infer that other downstream factors (e.g. low ovule fertility,

354 gamete isolation, or early fruit abortion) may have prevented fruit development in these three  
355 individuals.

356

357 *Large effect unilateral incompatibility QTL is associated with the S-locus and variation in*  
358 *functional S-RNase*

359 One large effect QTL was identified for UI, explaining 32.6% of the phenotypic variance  
360 among F<sub>2</sub>s, and 23.0% of the difference observed between the parents (**Table 2, Figure 2**).  
361 Located on chromosome 1, this QTL colocalizes both with the location of a UI QTL previously  
362 identified in a different *Solanum* cross (Bernacci and Tanksley, 1997) and with the genomic  
363 location of the S-locus (**Figure 2**), which contains genes encoding S-RNase, F-box proteins, and  
364 other factors involved in self-incompatibility (Bernacci and Tanksley, 1997; Li and Chetelat,  
365 2015). The 1.5 LOD CI of this QTL spans 29.47cM or ~85.08Mb, and contains 2684 gene models,  
366 based on the v2 annotation of the *S. pennellii* genome. This large low-recombination region is  
367 characteristic of the physical location of the S-locus (**Figure 2**), which exhibits suppressed  
368 recombination in this and other species.

369

370 Because *S-RNase* has been hypothesized, and shown, to be a significant contributor to  
371 the UI response in some previous studies in *Solanum* (Chalivendra, *et al.*, 2013; Covey, *et al.*,  
372 2010; Tovar-Méndez, *et al.*, 2014), we assessed a subset of F<sub>2</sub> individuals (n = 22) for expression  
373 of this protein in mature unpollinated styles. This subset represented individuals with the most  
374 and least rapid UI responses in our F<sub>2</sub> population. We found that individuals that expressed S-  
375 RNase protein had a significantly more rapid UI response (n = 9, mean = 0.0815 of style) against  
376 *S. lycopersicum* pollen, compared to those that did not express *S-RNase* (n = 13, mean = 0.227  
377 of style) (t(19.885) = 3.374, p = 0.003; **Figure 3**), indicating that S-RNase protein  
378 presence/absence is a major contributor to observed quantitative variation in UI. In comparison,  
379 all individuals were found to express HT-protein in their styles; therefore the presence/absence  
380 of HT-protein is not implicated in the phenotypic variation in UI segregating in our F<sub>2</sub> population.  
381 (Note that *HT* expression may still be required for the expression of UI; see Discussion.) The F<sub>1</sub>  
382 expressed both *HT* and *S-RNase* and had a rapid UI response.

383

384 Previous work in a different *Solanum* species cross also identified UI QTL on  
385 chromosomes 3 and 12 (Bernacci and Tanksley, 1997) as did a recent analysis of UI between *S.*  
386 *pennellii* (LA3778) and *S. lycopersicum* (LA3475) (Jewell 2016). We did not detect QTL at either  
387 of these positions. As HT-protein is thought to likely underlie the chromosome 12 UI QTL  
388 detected in other studies (Bernacchi and Tanksley, 1997; Tovar- Méndez, *et al.*, 2014; Jewell  
389 2016) this finding is consistent with our observation (above) of no differential protein  
390 expression of *HT* in our F<sub>2</sub> population.

391

392 *Floral traits vary with mating system differences between the parental genotypes*

393 The parent accessions differed in four of the six floral traits measured: stigma exertion,  
394 style length, and ovary height and width (**Table 1**). There were no significant differences  
395 between the parent populations for corolla diameter or anther length (**Table 1, Supplementary**  
396 **Figure 1**). Despite large parental differences, we identified only one QTL affecting floral  
397 morphology (**Table 2**). This locus, on chromosome four, had a moderate to large effect on

398 stigma exertion (percent variance explained = 17.1; percent parental difference explained =  
399 48.0). No significant QTL were detected for corolla diameter, anther length, style length, ovary  
400 height, or ovary width. Because of the limited size of the mapping population, our analyses  
401 likely missed smaller effect loci that contribute to observed parental variation in these floral  
402 traits.

403

#### 404 *Few fertility QTL detected*

405 We identified two QTL for fertility traits, both of which were for fruit height (**Table 2**,  
406 **Figure 2**) and were of small to moderate effect, explaining ~6-16% of the variation among F<sub>2</sub>s  
407 and 5% of the parental difference each. There was no evidence for an interaction between  
408 these QTL. Interestingly, these two QTL have opposing effects on fruit height, consistent with  
409 little difference between the parental accessions in this fruit trait. Neither of the detected  
410 fertility trait QTL colocalized with our UI QTL on chromosome 1.

411

## 412 **Discussion**

413

414 Standing genetic variation across populations within species can contribute to  
415 differences in the strength of interspecific isolating barriers. Understanding the nature of this  
416 genetic variation can provide insight into the evolutionary dynamics that shape the  
417 accumulation of these barriers among diverging species. Here we assessed the genetic basis of  
418 intraspecific variation in the strength of interspecific pistil-side unilateral incompatibility (UI).  
419 One goal was to assess whether variation in key components of mating system variation  
420 (including genetic self-incompatibility) influences this phenotypic variation. We found one large  
421 effect QTL underlying variation among populations in the rate at which UI is expressed against a  
422 second species. This QTL overlaps a major player in the self-incompatibility response--the *S*-  
423 locus--and we found that the presence/absence of stylar *S*-RNase protein is significantly  
424 associated with the rapidity of the UI response. Although we observe trait and genetic  
425 differences in floral and fertility traits between these two *S. pennellii* populations, some of  
426 which are typically associated with mating system transitions, QTL underlying these differences  
427 are not associated with the major effect locus controlling variation in the strength of UI. Our  
428 analysis suggests that standing variation for mate choice loci--in this case, to prevent self-  
429 fertilization--can directly affect variation in interspecific isolation--in this case a postmating  
430 prezygotic reproductive barrier.

431

#### 432 *UI genetic mechanisms are associated with mating system loci*

433 Both our QTL mapping analysis and our protein expression assay support the inference  
434 that *S*-RNase protein plays a major causal role in the observed quantitative variation in UI  
435 responses. In Solanaceae, loss of SI often involves the loss of pistil *S*-RNase expression as one of  
436 the first causal changes, so that individuals no longer reject conspecific pollen with which they  
437 share the functional pollen-side component of the SI mechanism. Our analysis indicates that  
438 this loss of pistil *S*-RNase protein in the SC *S. pennellii* accession (LA0716) has pleiotropic  
439 consequences for the rate at which this genotype rejects heterospecific pollen. While all  
440 individuals expressed UI within our F<sub>2</sub> population, the speed of UI pollen rejection was  
441 significantly decreased when *S*-RNase protein was absent. Thus, we infer that standing variation

442 within *S. pennellii* at a major mating system locus also directly contributes to how rapidly an  
443 interspecific postmating prezygotic barrier is expressed.

444

445 In addition, our data also imply that other molecular factors beyond *S-RNase* also  
446 contribute to UI expression in this species. That is, while loss of functional S-RNase protein  
447 reduced the speed of UI it did not abolish this response, suggesting other functional UI  
448 elements are retained in the pistil. S-RNase-independent UI mechanisms have been described  
449 previously in *Solanum* (Murfett, *et al.*, 1996; Eberle, *et al.*, 2013; Tovar-Méndez, *et al.*, 2017;  
450 reviewed in Bedinger *et al.*, 2017). In particular, HT protein has been implicated as a necessary  
451 molecular component of the UI response in *Nicotiana* and in other *Solanum* crosses (Bernacci  
452 and Tanksley, 1997; Covey, *et al.*, 2010; Hancock, Kent and McClure, 2005; McClure, *et al.*, 1999;  
453 O'Brien, 2002; Tovar-Méndez, *et al.*, 2017). In addition, both SC and SI *S. pennellii* populations  
454 have previously been shown to express *HT* in their styles (Chalivendra, *et al.*, 2013, Pease *et al.*  
455 2016), and here we found that all tested F<sub>2</sub> individuals also expressed *HT*. Together, these  
456 observations suggest that the observed quantitative variation in UI expression depends on  
457 variation in the functionality of *S-RNase*, on a background of functional *HT* expression. In  
458 addition to *HT*, there might also be other S-RNase-independent factors supporting UI function  
459 in these accessions. For example, other QTL studies have identified a major effect UI QTL on  
460 chromosome 3 in populations generated between *S. lycopersicum* and SI *S. habrochaites*  
461 (Bernacci and Tanksley, 1997) and between *S. lycopersicum* and the SI *S. pennellii* parent  
462 genotype used in our cross here (Jewell 2016, Hamlin *et al.* 2018). Furthermore, loss-of function  
463 of *HT* in SC *S. pennellii* accession (LA0716) resulted in tomato pollen rejection further down the  
464 pistil, suggesting that in addition to the S-RNase-independent UI factors there are also HT-  
465 independent UI factors (Tovar-Méndez, *et al.*, 2017). The potential contribution of additional  
466 factors to *S. pennellii* intraspecific variation in UI is testable in the future, once the specific  
467 identity of these factors is known.

468

469 Regardless, our observations support a mechanistic, explicitly genetic, association  
470 between SI and UI, consistent with other studies in closely related species (Broz *et al.* 2017,  
471 Tovar-Méndez, *et al.*, 2014; Tovar-Méndez, *et al.*, 2017). These findings in turn imply that  
472 factors governing the maintenance or loss of SI can have collateral effects on the expression of  
473 UI barriers among species. Ecologically, the loss of SI is often associated with strong selection  
474 for reproductive assurance in low density or marginal environmental conditions, where small  
475 population sizes severely restrict the availability of mating partners with different S-haplotypes.  
476 Under these conditions, individuals that are physiologically capable of selfing—due to loss of  
477 proteins involved in self-recognition and rejection—have a demographic and mating advantage.  
478 If SI and UI share underlying genetic mechanisms, these specific ecological conditions will also  
479 strongly determine the emergence and distribution of UI mating barriers between lineages, as  
480 will the physiological constraints governing the genetic progression of SI to SC transitions, as we  
481 discuss further below.

482

483 *No evidence for an association between UI and floral trait loci across mating transitions*

484 Another possibility we examined was whether the strength or expression of UI was  
485 associated with other, non-SI, transitions that accompany mating system differences. Although

486 losing SI permits selfing, the transition from facultative to predominant self-fertilization often  
487 involves additional morphological changes, especially in floral traits that affect pollinator  
488 attraction and the likelihood of self-pollination. While outcrossing species typically have larger  
489 flowers and greater distances between the receptive stigmatic surface of the female pistil and  
490 the male pollen-bearing anthers (i.e. greater stigma exertion) (Brunet and Eckert, 1998;  
491 Motten and Stone, 2000; Rick, Holle and Thorp, 1978; Takebayashi, Wolf and Delph, 2005),  
492 highly self-pollinating species tend to have smaller flowers and smaller or no stigma exertion  
493 (Lloyd and Barrett, 1996; Sicard and Lenhard, 2011). It is unclear to what extent changes in loci  
494 directly involved in the breakdown of SI (i.e. *S*-locus and its modifiers) work in conjunction with  
495 the genes controlling these morphological changes, as well as whether these morphological loci  
496 are associated with the expression of UI. Here, we found some floral morphology differences  
497 between the LA3778 and LA0716 parent populations that are typical of mating system  
498 differences, specifically greater stigma exertion and greater style length in the SI compared to  
499 the SC parent genotype (Table 1), and we identified one QTL for stigma exertion (Table 2).  
500 However, this QTL did not coincide with the UI QTL (or with known loci involved in SI). These  
501 findings provide little evidence for strong phenotypic or genetic associations between the loss  
502 of gametophytic SI and/or the expression of UI, and the morphological shifts that typically  
503 accompany mating system transitions.

504

#### 505 *The progression to UI among species, and the role of mating system transitions*

506 Finally, our findings also contribute to an emerging picture of the evolution of UI  
507 between species, and the specific role of mating system transitions in the formation of this  
508 post-mating prezygotic isolation barrier. First, in conjunction with mapping studies (Bernacchi  
509 and Tanksley 1997, Jewell 2016) and crossing analyses (e.g. Broz et al. 2017; see further below)  
510 in other closely-related *Solanum* species, we infer that quantitative transitions from UI  
511 competence to its loss are often associated with the cumulative loss of one or more loci  
512 functionally involved in self-incompatibility. For example, *S. habrochaites* (the sister species to *S.*  
513 *pennellii*) is generally an SI species within which some populations have transitioned to SC  
514 (Martin 1961), often (but not always) via the loss of functional *S-RNase* genes (Broz et al. 2016,  
515 Markova et al. 2016). Unlike the two populations of *S. pennellii* examined here, several of these  
516 *S. habrochaites* SC populations have also lost the ability to reject certain heterospecific pollen—  
517 consistent with the loss of UI competence (Baek, et al., 2015; Covey, et al., 2010, Broz et al.  
518 2016) via the loss of one or more additional pistil-side UI factors. This greater loss of UI  
519 competence, which may be related to a longer history of self-compatibility in these *S.*  
520 *habrochaites* populations, appears to involve at least one other *S-RNase*-independent  
521 molecular player apart from *HT*, as all but one of these populations continue to express *HT*  
522 (Baek, et al., 2015; Covey, et al., 2010, Broz et al. 2017). Nonetheless, *HT* can clearly also  
523 contribute to this transition from UI to non-UI styles, as Tovar-Méndez, et al., (2017) showed  
524 that suppressing *HT* expression in *S. habrochaites* LA0407 completely abolished UI against (SC) *S.*  
525 *lycopersicum* pollen. Together, these observations suggest that populations undergoing a  
526 progressive loss of pistil-factors can proceed stepwise from rapid UI against other SC species  
527 (coincident with a fully functional SI system), through a transitional period of quantitative  
528 reductions in the strength of UI (coincident with the loss of pistil-side factors during the



529 transition from SI to SC), to loss of UI against other species (coincident with the loss of both S-  
530 RNase-dependent and -independent rejection mechanisms).

531  
532 Notably, while the progressive loss of pistil-side factors ultimately results in genotypes  
533 unable to mount a pistil-side UI rejection response, observations also indicate that transitions  
534 from SI to SC can be accompanied by the gain of UI, specifically the gained ability of SI lineages  
535 to reject the pollen of SC lineages (e.g. Martin 1961, Broz et al. 2016, Marcova et al. 2016).  
536 However this emergence of UI against SC lineages is not due to pistil-side changes, but instead  
537 to a progressive loss within these recently derived SC lineages of pollen-side function(s) that  
538 would otherwise neutralize pistil rejection responses (Bedinger et al. 2017). For example, within  
539 *S. habrochaites*, pollen from some SC populations is rejected by SI populations of the same  
540 species (Broz *et al.*, 2017), likely due to the loss of one or more pollen-side factors specifically in  
541 these SC populations (Markova et al. 2016). In contrast, SI populations do not reject pollen from  
542 SI populations or species, indicating that SI pollen retain mechanisms for evading UI rejection in  
543 styles of other SI species. Note that the *S. pennellii* populations used here reciprocally accept  
544 each other's pollen, indicating that the SC *S. pennellii* accession LA0716 has not progressed to  
545 the point at which UI barriers have emerged against it.

546  
547 This observed progression indicates a specific temporal order to the loss of pistil-side UI  
548 and the gain of pollen-side UI rejection by other lineages, a trajectory that is strongly influenced  
549 by the dynamics governing the loss of intraspecific SI factors during transitions from SI to SC.  
550 Interestingly, in the Solanaceae (but not in other plant groups that have SI systems; Bedinger et  
551 al. 2017) this transition from SI to SC usually first involves the loss of loci that contribute to  
552 pistil-side function, and only subsequently the loss of pollen-side functions (Tovar-Méndez, *et*  
553 *al.*, 2014). This 'pistil-first' transition order likely occurs because the physiology of gametophytic  
554 self-incompatibility: pollen loss-of-function mutations are incompatible on all pistils that retain  
555 pistil-side function, but genotypes with pistil-side SC mutations are able to accept all pollen  
556 donors (see also Markova et al. 2016). This leads to strong selection against pollen-side  
557 mutations because these cannot individually permit self-compatibility, and therefore will not  
558 contribute to reproductive assurance unless they are first preceded by pistil-side mutations.  
559 This expectation is supported by the observation that there are no known SC populations or  
560 species that lack SI pollen function but retain pistil function, in the Solanaceae (Tovar-Méndez,  
561 *et al.*, 2014). In this way, loss of *S-RNase* and other pistil-side factors does not contribute  
562 immediately to the gain of UI, but acts as a catalyst for evolutionary changes that eventually  
563 lead to the erection of an UI barrier against the evolving population, by permitting the  
564 subsequent loss of pollen side factors. Although the conditions promoting this subsequent loss  
565 of pollen-side factors are less clear, it is possible that these mutations reduce metabolic cost  
566 (Markova et al. 2016) or increase selfing efficiency once populations have already lost pistil-side  
567 SI functions.

568  
569 Regardless, it is clear that the dynamics of these mating system transitions play an  
570 influential role in the evolution of UI as a reproductive barrier. Moreover, understanding the  
571 nature of intraspecific genetic variation involved in these transitions is critical for understanding  
572 the conditions that facilitate the accumulation of reproductive isolation among populations



573 within species (Good, *et al.*, 2007; Kopp and Frank, 2005). Here, in our analysis of genetic  
574 variation within *S. pennellii*, we have shown that one of the earliest steps in this progression  
575 involves the large quantitative contribution of a pistil-side locus that is directly involved in  
576 intraspecific mate choice (via self-incompatibility). This finding agrees with previous analyses  
577 that indicate an intimate association between molecular players contributing to SI and UI. In  
578 combination with genetic and crossing data from this and other closely related species, it also  
579 suggests that intraspecific changes at these pistil-side loci are an essential antecedent step that  
580 permits the subsequent accumulation of mutations that erect new intraspecific postmating  
581 prezygotic UI barriers.

582

### 583 **Funding**

584 This work was supported by the National Science Foundation (grant number IOS-1127059) to  
585 ATM, BAM, and LCM; and the American Genetic Association Evolutionary, Ecological or  
586 Conservation Genomics Research Award to CPJ.

587

### 588 **Acknowledgements**

589 We thank J Kissinger and DC Haak for assistance in data collection, other members of the IRBT  
590 Tomato group (Patricia Bedinger, Roger Chetelat, and Matthew Hahn) for discussions, and the  
591 Indiana University Bloomington greenhouse staff.

592

### 593 **Data Availability**

594 The primary data underlying these analyses will be deposited as follows:

595 - morphological data: Dryad #####

596 - raw sequence reads and SNP genotypes: NCBI BioProject: PRJNA557135.

597

598

599

## 600 References

- 601 ABRAMOFF M, MAGALHAES P, RAM S. 2004 Image processing with ImageJ. *Biophotonics International*.  
602 11(7):36-42.
- 603 ARENDS D, PRINS P, JANSEN RC, BROMAN KW. 2010 R/qtl: High-throughput multiple QTL mapping.  
604 *Bioinformatics*. 26(23):2990-2992.
- 605 BAEK YS, COVEY PA, PETERSEN JJ, CHETELAT RT, MCCLURE B, BEDINGER PA. 2015 Testing the SI x SC  
606 rule: Pollen-pistil interactions in interspecific crosses between members of the tomato clade (*Solanum*  
607 section *Lycopersicon*, Solanaceae). *American Journal of Botany*. 102(2):302-311.
- 608 BEDINGER PA, BROZ AK, TOVAR-MENDEZ A, MCCLURE B. 2017 Pollen-Pistil Interactions and Their Role  
609 in Mate Selection. *Plant Physiology*. 173(1):79-90.
- 610 BEDINGER PA, CHETELAT RT, MCCLURE B, MOYLE LC, ROSE JKC, STACK SM, VAN DER KNAAP E, BAEK YS,  
611 LOPEZ-CASADO G, COVEY PA, KUMAR A, LI W, NUNEZ R, CRUZ-GARCIA F, ROYER S. 2010 Interspecific  
612 reproductive barriers in the tomato clade: opportunities to decipher mechanisms of reproductive  
613 isolation. *Sex Plant Reprod*. 24(3):171-187.
- 614 BERNACCHI D, TANKSLEY SD. 1997 An interspecific backcross of *Lycopersicon esculentum* x *L. hirsutum*:  
615 Linkage analysis and a QTL study of sexual compatibility factors and floral traits. *Genetics*. 147(2):861-  
616 877.
- 617 BOLGER A, SCOSSA F, BOLGER ME, LANZ C, MAUMUS F, TOHGE T, QUESNEVILLE H, ALSEEKH S,  
618 SORENSEN I, LICHTENSTEIN G, FICH EA, CONTE M, KELLER H, SCHNEEBERGER K, SCHWACKE R, OFNER I,  
619 VREBALOV J, XU YM, OSORIO S, AFLITOS SA, SCHIJLEN E, JIMENEZ-GOMEZ JM, RYNGAJLLO M, KIMURA  
620 S, KUMAR R, KOENIG D, HEADLAND LR, MALOOF JN, SINHA N, VAN HAM R, LANKHORST RK, MAO LY,  
621 VOGEL A, ARSOVA B, PANSTRUGA R, FEI ZJ, ROSE JKC, ZAMIR D, CARRARI F, GIOVANNONI JJ, WEIGEL D,  
622 USADEL B, FERNIE AR. 2014 The genome of the stress-tolerant wild tomato species *Solanum pennellii*.  
623 *Nature Genetics*. 46(9):1034-1038.
- 624 BORDENSTEIN SR, DRAPEAU MD, WERREN JH. 2000 Intraspecific variation in sexual isolation in the  
625 jewel wasp *Nasonia*. *Evolution*. 54(2):567-573.
- 626 BROMAN KW, WU H, SEN S, CHURCHILL GA. 2003 R/qtl: QTL mapping in experimental crosses.  
627 *Bioinformatics*. 19(7):889-890.
- 628 BROWN M, LOWE DG. 2007 Automatic panoramic image stitching using invariant features.  
629 *International Journal of Computer Vision*. 74(1):59-73.
- 630 BROZ AK, RANDLE AM, SIANTA SA, TOVAR-MENDEZ A, MCCLURE B, BEDINGER PA. 2017 Mating system  
631 transitions in *Solanum habrochaites* impact interactions between populations and species. *New*  
632 *Phytologist*. 213(1):440-454.
- 633 BRUNET J, ECKERT CG. 1998 Effects of floral morphology and display on outcrossing in Blue Columbine,

- 634 *Aquilegia caerulea* (Ranunculaceae). *Functional Ecology*. 12(4):596-606.
- 635 CASE AL, WILLIS JH. 2008 Hybrid male sterility in *Mimulus* (Phrymaceae) is associated with a  
636 geographically restricted mitochondrial rearrangement. *Evolution*. 62(5):1026-1039.
- 637 CHALIVENDRA SC, LOPEZ-CASADO G, KUMAR A, KASSEN BROCK AR, ROYER S, TOVAR-MENDEZ A, COVEY  
638 PA, DEMPSEY LA, RANDLE AM, STACK SM, ROSE JKC, MCCLURE B, BEDINGER PA. 2013 Developmental  
639 onset of reproductive barriers and associated proteome changes in stigma/styles of *Solanum pennellii*.  
640 *Journal of Experimental Botany*. 64(1):265-279.
- 641 CHUNG H, LOEHLIN DW, DUFOUR HD, VACCARRO K, MILLAR JG, CARROLL SB. 2014 A Single Gene  
642 Affects Both Ecological Divergence and Mate Choice in *Drosophila*. *Science*. 343(6175):1148-1151.
- 643 COVEY PA, KONDO K, WELCH L, FRANK E, SIANTA S, KUMAR A, NUÑEZ R, LOPEZ-CASADO G, VAN DER  
644 KNAAP E, ROSE JKC, MCCLURE BA, BEDINGER PA. 2010 Multiple features that distinguish unilateral  
645 incongruity and self-incompatibility in the tomato clade. *The Plant Journal*. 64(3):367-378.
- 646 CUTTER AD. 2012 The polymorphic prelude to Bateson-Dobzhansky-Muller incompatibilities. *Trends in  
647 Ecology & Evolution*. 27(4):209-218.
- 648 DE NETTANCOURT D. 1977 *Incompatibility in angiosperms*. Springer-Verlag, Heidelberg, Germany.
- 649 EBERLE CA, ANDERSON NO, CLASEN BM, HEGEMAN AD, SMITH AG. 2013 PELPIII: the class III pistil-  
650 specific extensin-like *Nicotiana tabacum* proteins are essential for interspecific incompatibility. *Plant J*.  
651 74, 805–814.
- 652 ELSHIRE RJ, GLAUBITZ JC, SUN Q, POLAND JA, KAWAMOTO K, BUCKLER ES, MITCHELL SE. 2011 A robust,  
653 simple Genotyping-by-Sequencing (GBS) approach for high diversity species. *Plos One*. 6(5): e19379.
- 654 GOOD JM, HANDEL MA, NACHMAN MW. 2008 Asymmetry and polymorphism of hybrid male sterility  
655 during the early stages of speciation in house mice. *Evolution*. 62(1):50-65.
- 656 HANCOCK CN, KENT L, MCCLURE BA. 2005 The stylar 120 kDa glycoprotein is required for S-specific  
657 pollen rejection in *Nicotiana*. *Plant Journal*. 43(5):716-723.
- 658 HOPKINS R, RAUSHER MD. 2012 Pollinator-Mediated Selection on Flower Color Allele Drives  
659 Reinforcement. *Science*. 335(6072):1090-1092.
- 660 IGIC B, LANDE R, KOHN JR. 2008 Loss of self-incompatibility and its evolutionary consequences.  
661 *International Journal of Plant Sciences*. 169(1):93-104.  
662
- 663 JEWELL, CP. 2016 *Genetics and Evolution of Reproductive Behavior in Solanaceae*. PhD Diss.  
664 Indiana University. Bloomington, Indiana.
- 665 KAY KM, SARGENT RD. 2009 The Role of Animal Pollination in Plant Speciation: Integrating Ecology,  
666 Geography, and Genetics. In: *Annual Review of Ecology Evolution and Systematics*, Vol. 40: Annual

- 667 *Review of Ecology Evolution and Systematics*), pp. 637-656.
- 668 KEARNS C, INOUE D. 1993 *Techniques for Pollination Biologists*. University of Colorado Press, Niwot,  
669 CO.
- 670
- 671 KONDO K, YAMAMOTO M, ITAHASHI R, SATO T, EGASHIRA H, HATTORI T, KOWYAMA Y. 2002 Insights  
672 into the evolution of self-compatibility in *Lycopersicon* from a study of stelar factors. *Plant Journal*.  
673 30(2):143-153.
- 674 KOPP A, FRANK AK. 2005 Speciation in progress? A continuum of reproductive isolation in *Drosophila*  
675 *bipunctata*. *Genetica*. 125(1):55-68.
- 676 KOZLOWSKA JL, AHMAD AR, JAHESH E, CUTTER AD. 2012 Genetic variation for postzygotic reproductive  
677 isolation between *Caenorhabditis briggsae* and *Caenorhabditis sp. 9*. *Evolution*. 66(4):1180-1195.
- 678 KUBO K, ENTANI T, TAKARA A, WANG N, FIELDS AM, HUA ZH, TOYODA M, KAWASHIMA S, ANDO T,  
679 ISOGAI A, KAO T, TAKAYAMA S. 2010 Collaborative non-self recognition system in S-RNase-based self-  
680 incompatibility. *Science*. 330(6005):796-799.
- 681 KUBO K, PAAPE T, HATAKEYAMA M, ENTANI T, TAKARA A, KAJIHARA K, TSUKAHARA M, SHIMIZU-  
682 INATSUGI R, SHIMIZU KK, TAKAYAMA S. 2015 Gene duplication and genetic exchange drive the  
683 evolution of S-RNase-based self-incompatibility in *Petunia*. *Nature Plants*. 1(1): 14005.
- 684 LEPPALA J, SAVOLAINEN O. 2011 Nuclear-cytoplasmic interactions reduce male fertility in hybrids of  
685 *Arabidopsis lyrata* subspecies *Evolution*. 65(10):2959-2972.
- 686 LEWIS D, CROWE L. 1958 Unilateral interspecific incompatibility in flowering plants. *Heredity*.  
687 12(2):233-256.
- 688 LI H. 2013 Aligning sequence reads, clone sequences and assembly contigs with BWA-MEM. arXiv.  
689 1303.3997v1.
- 690 LI WT, CHETELAT RT. 2015 Unilateral incompatibility gene *ui1.1* encodes an S-locus F-box protein  
691 expressed in pollen of *Solanum* species. *Proceedings of the National Academy of Sciences of the United*  
692 *States of America*. 112(14):4417-4422.
- 693 LIEDL BE, MCCORMICK S, MUTSCHLER MA. 1996 Unilateral incongruity in crosses involving  
694 *Lycopersicon pennellii* and *L. esculentum* is distinct from self-incompatibility in expression, timing and  
695 location. *Sexual Plant Reproduction*. 9(5):299-308.
- 696 LLOYD D, BARRETT S. 1996 *Floral Biology: Studies on floral evolution in animal pollinated plants*.  
697 Chapman and Hall, New York.
- 698 LOWRY DB, MODLISZEWSKI JL, WRIGHT KM, WU CA, WILLIS JH. 2008 The strength and genetic basis of  
699 reproductive isolating barriers in flowering plants. *Philosophical Transactions of the Royal Society B-*  
700 *Biological Sciences*. 363(1506):3009-3021.

- 701 MACHADO CA, HASELKORN TS, NOOR MAF. 2007 Evaluation of the genomic extent of effects of fixed  
702 inversion differences on intraspecific variation and interspecific gene flow in *Drosophila pseudoobscura*  
703 and *D. persimilis*. *Genetics*. 175(3):1289-1306.
- 704 MARKOVA DN, PETERSEN JJ, QIN XQ, SHORT DR, VALLE MJ, TOVAR-MENDEZ A, MCCLURE BA,  
705 CHETELAT RT. 2016 Mutations in two pollen self-incompatibility factors in geographically marginal  
706 populations of *Solanum habrochaites* impact mating system transitions and reproductive isolation.  
707 *American Journal of Botany*. 103(10):1847-1861.
- 708 MARTIN NH, WILLIS JH. 2010 Geographical variation in postzygotic isolation and its genetic basis within  
709 and between two *Mimulus* species. *Philosophical Transactions of the Royal Society B-Biological*  
710 *Sciences*. 365(1552):2469-2478.
- 711 MCCLURE B, CRUZ-GARCIA F, ROMERO C. 2011 Compatibility and incompatibility in S-RNase-based  
712 systems. *Annals of Botany*. 108(4):647-658.
- 713 MCCLURE B, MOU BQ, CANEVASCINI S, BERNATZKY R. 1999 A small asparagine-rich protein required  
714 for S-allele-specific pollen rejection in *Nicotiana*. *Proceedings of the National Academy of Sciences of*  
715 *the United States of America*. 96(23):13548-13553.
- 716 MCCLURE BA, HARING V, EBERT PR, ANDERSON MA, SIMPSON RJ, SAKIYAMA F, CLARKE AE. 1989 Style  
717 self-incompatibility gene products of *Nicotiana glauca* are ribonucleases *Nature*. 342(6252):955-957.
- 718 MIAO CY, FANG JP, LI DL, LIANG PP, ZHANG XT, YANG JL, SCHNABLE JC, TANG HB. 2018 Genotype-  
719 Corrector: improved genotype calls for genetic mapping in F2 and RIL populations. *Scientific Reports*. 8.
- 720 MOTTEN AF, STONE JL. 2000 Heritability of stigma position and the effect of stigma-anther separation  
721 on outcrossing in a predominantly self-fertilizing weed, *Datura stramonium* (Solanaceae). *American*  
722 *Journal of Botany*. 87(3):339-347.
- 723 MOYLE LC. 2007 Comparative genetics of potential prezygotic and postzygotic isolating barriers in a  
724 *Lycopersicon* species cross. *Journal of Heredity*. 98(2):123-135.
- 725 MOYLE LC, GRAHAM EB. 2005 Genetics of hybrid incompatibility between *Lycopersicon esculentum* and  
726 *L. hirsutum*. *Genetics*. 169(1):355-373.
- 727 MOYLE LC, JEWELL CP, KOSTYUN JL. 2014 Fertile approaches to dissecting mechanisms of pre-mating  
728 and post-mating prezygotic reproductive isolation. *Current Opinion in Plant Biology*. 18:16-23.
- 729 MURFETT J, STRABALA TJ, ZUREK DM, MOU BQ, BEECHER B, MCCLURE BA. 1996 S RNase and  
730 interspecific pollen rejection in the genus *Nicotiana*: Multiple pollen-rejection pathways contribute to  
731 unilateral incompatibility between self-incompatible and self-compatible species. *Plant Cell*. 8(6):943-  
732 958.
- 733 O'BRIEN M, KAPFER C, MAJOR G, LAURIN M, BERTRAND C, KONDO K, KOWYAMA Y, MATTON DP. 2002  
734 Molecular analysis of the stilar-expressed *Solanum chacoense* small asparagine-rich protein family

- 735 related to the *HT* modifier of gametophytic self-incompatibility in *Nicotiana*. *Plant Journal*. 32(6):985-  
736 996.
- 737 PEASE JB, GUERRERO RF, SHERMAN NA, HAHN MW, MOYLE LC. 2016 Molecular mechanisms of  
738 postmating prezygotic reproductive isolation uncovered by transcriptome analysis. *Molecular Ecology*.  
739 25(11):2592-2608.
- 740 PEASE JB, HAAK DC, HAHN MW, MOYLE LC. 2016 Phylogenomics reveals three sources of adaptive  
741 variation during a rapid radiation. *Plos Biology*. 14(2).
- 742 PERALTA I, SPOONER D, KNAPP S. 2008 Taxonomy of wild tomatoes and their relatives (*Solanum* sect.  
743 *Lycopersicoides*, sect. *Juglandifolia*, sect. *Lycopersicon*; Solanaceae). *Systematic Botany Monographs*.  
744 84:1-186.
- 745 QUINLAN AR, HALL IM. 2010 BEDTools: a flexible suite of utilities for comparing genomic features.  
746 *Bioinformatics*. 26(6):841-842.
- 747
- 748 R CORE TEAM. 2015. R: A language and environment for statistical computing. Vienna, Austria:  
749 Sponsored by the R Foundation for Statistical Computing.
- 750 REED LK, MARKOW TA. 2004 Early events in speciation: Polymorphism for hybrid male sterility in  
751 *Drosophila*. *Proceedings of the National Academy of Sciences of the United States of America*.  
752 101(24):9009-9012.
- 753 RICK C, CHETELAT RT. 1991 The breakdown of self-incompatibility in *Lycopersicum hirsutum*. In:  
754 *Solanaceae III: Taxonomy, Chemistry, Evolution*. (Hawkes J, Lester R, Nee M, Estrada N, eds). Kew  
755 Publishing, Royal Botanic Gardens, UK.
- 756 RICK CM, HOLLE M, THORP RW. 1978 Rates of cross-pollination in *Lycopersicon pimpinellifolium* -  
757 Impact of genetic variation in floral characters *Plant Systematics and Evolution*. 129(1-2):31-44.
- 758 RIESEBERG LH. 2000 Crossing relationships among ancient and experimental sunflower hybrid lineages.  
759 *Evolution*. 54(3):859-865.
- 760 RIESEBERG LH, WILLIS JH. 2007 Plant speciation. *Science*. 317(5840):910-914.
- 761 RODRIGUEZ F, WU FN, ANE C, TANKSLEY S, SPOONER DM. 2009 Do potatoes and tomatoes have a  
762 single evolutionary history, and what proportion of the genome supports this history? *BMC*  
763 *Evolutionary Biology*. 9(1): 191.
- 764 SHUKER DM, UNDERWOOD K, KING TM, BUTLIN RK. 2005 Patterns of male sterility in a grasshopper  
765 hybrid zone imply accumulation of hybrid incompatibilities without selection. *Proceedings of the Royal*  
766 *Society B-Biological Sciences*. 272(1580):2491-2497.
- 767 SICARD A, LENHARD M. 2011 The selfing syndrome: a model for studying the genetic and evolutionary  
768 basis of morphological adaptation in plants. *Annals of Botany*. 107(9):1433-1443.



- 769 SIJACIC P, WANG X, SKIRPAN AL, WANG Y, DOWD PE, MCCUBBIN AG, HUANG S, KAO TH. 2004  
770 Identification of the pollen determinant of S-RNase-mediated self-incompatibility. *Nature*.  
771 429(6989):302-305.
- 772 SWANSON R, EDLUND AF, PREUSS D. 2004 Species specificity in pollen-pistil interactions. *Annual*  
773 *Review of Genetics*. 38:793-818.
- 774 SWEIGART AL, MASON AR, WILLIS JH. 2007 Natural variation for a hybrid incompatibility between two  
775 species of *Mimulus*. *Evolution*. 61(1):141-151.
- 776 TAKEBAYASHI N, WOLF DE, DELPH LF. 2006 Effect of variation in herkogamy on outcrossing within a  
777 population of *Gilia achilleifolia*. *Heredity*. 96(2):159-165.
- 778 TAYLOR J, BUTLER D. 2017 R Package ASMap: Efficient Genetic Linkage Map Construction and Diagnosis.  
779 *Journal of Statistical Software*. 79(6):1-29.
- 780 TOVAR-MENDEZ A, KUMAR A, KONDO K, ASHFORD A, BAEK YS, WELCH L, BEDINGER PA, MCCLURE BA.  
781 2014 Restoring pistil-side self-incompatibility factors recapitulates an interspecific reproductive barrier  
782 between tomato species. *Plant Journal*. 77(5):727-736.
- 783 TOVAR-MENDEZ A, LU L, MCCLURE B. 2017 HT proteins contribute to S-RNase-independent pollen  
784 rejection in *Solanum*. *Plant Journal*. 89(4):718-729.
- 785 VOSTERS SL, JEWELL CP, SHERMAN NA, EINTERZ F, BLACKMAN BK, MOYLE LC. 2014 The timing of  
786 molecular and morphological changes underlying reproductive transitions in wild tomatoes (*Solanum*  
787 sect. *Lycopersicon*). *Molecular Ecology*. 23(8):1965-1978.
- 788 VYSKOCILOVA M, PRAZANOVA G, PIALEK J. 2009 Polymorphism in hybrid male sterility in wild-derived  
789 *Mus musculus musculus* strains on proximal chromosome 17. *Mammalian Genome*. 20(2):83-91.
- 790 WILLIAMS JS, DER JP, DEPAMPHILIS CW, KAO TH. 2014 Transcriptome Analysis Reveals the Same 17 S-  
791 Locus F-Box Genes in Two Haplotypes of the Self-Incompatibility Locus of *Petunia inflata*. *Plant Cell*.  
792 26(7):2873-2888.
- 793 WU YH, BHAT PR, CLOSE TJ, LONARDI S. 2008 Efficient and Accurate Construction of Genetic Linkage  
794 Maps from the Minimum Spanning Tree of a Graph. *Plos Genetics*. 4(10).
- 795 XU SQ, SCHLUTER PM, GROSSNIKLAUS U, SCHIESTL FP. 2012 The Genetic Basis of Pollinator Adaptation  
796 in a Sexually Deceptive Orchid. *Plos Genetics*. 8(8).
- 797 YEH SD, TRUE JR. 2014 The Genetic Architecture of Coordinately Evolving Male Wing Pigmentation and  
798 Courtship Behavior in *Drosophila elegans* and *Drosophila gunungcola*. *G3-Genes Genomes Genetics*.  
799 4(11):2079-2093.
- 800 ZUELLIG MP, SWEIGART AL. 2018 A two-locus hybrid incompatibility is widespread, polymorphic, and  
801 active in natural populations of *Mimulus*. *Evolution*. 72(11):2394-2405.

802 ZUELLIG MP, SWEIGART AL. 2018 Gene duplicates cause hybrid lethality between sympatric species of  
803 Mimulus. Plos Genetics. 14(4).

804

805

806

807 **Table and Figure captions**

808

809 **Table 1.** Trait differences between individuals (n = 5) of the parental accessions, reported as  
810 means and standard deviations. T-tests (one-sided) are reported for differences between the  
811 parental accessions. Comparisons with  $p < 0.05$  are denoted in bold.  $F_1$  hybrid values are also  
812 reported; NA = not evaluated.

813

814 **Table 2.** QTL associated with unilateral incompatibility, floral traits, and fertility traits. Percent  
815 phenotypic variance (PVE) and percent parental difference (RHE) explained are reported for  
816 each trait, with full models including all QTL found for each phenotype.

817

818 **Figure 1.** Variation in the strength of unilateral incompatibility (UI) responses between *S.*  
819 *pennellii* populations. **A.** Representative image of an  $F_2$  with a rapid UI response. **B.** Image of an  
820  $F_2$  with a less rapid UI response. **C.** Phenotypic distribution of unilateral incompatibility  
821 responses across the  $F_2$  population. Blue dashed line (0.038) is the *S. pennellii* SI parent  
822 (LA3778); orange dashed line (0.32) is the *S. pennellii* SC parent (LA0716).

823

824 **Figure 2.** Map of identified QTL. Each QTL is marked with the 1.5-LOD confidence interval, with  
825 the peak marker indicated by a horizontal line. *A priori* hypothesized loci are marked as ellipses.

826

827 **Figure 3.** Expression of S-RNase in  $F_2$  mature styles as determined by a protein blot. There is  
828 significantly more rapid UI response in those styles that express S-RNase compared to those  
829 that do not ( $t = 3.374$ ,  $p = 0.003$ ).

830  
831  
832  
833  
834  
835  
836

**Table 1.** Trait differences between individuals (n = 5) of the parental accessions, reported as means and standard deviations. T-tests (one-sided) are reported for differences between the parental accessions. Comparisons with p < 0.05 are denoted in bold. F<sub>1</sub> hybrid values are also reported; NA = not evaluated.

| Trait                    | <i>S. pennellii</i><br>(LA0716, SC) | <i>S. pennellii</i><br>(LA3778, SI) | t-test                       | F <sub>1</sub>                  |
|--------------------------|-------------------------------------|-------------------------------------|------------------------------|---------------------------------|
| UI                       | 0.322 ± 0.026                       | 0.038 ± 2.66 × 10 <sup>-5</sup>     | t = -3.34; <b>p = 0.022</b>  | 0.039 ± 3.43 × 10 <sup>-4</sup> |
| Corolla Diameter (mm)    | 21.22 ± 1.88                        | 20.73 ± 0.86                        | t = -0.54, p = 0.612         | 28.31 ± 1.31                    |
| Anther Length (mm)       | 7.08 ± 0.85                         | 7.59 ± 0.33                         | t = 1.26, p = 0.263          | 9.44 ± 0.55                     |
| Stigma Exsertion (mm)    | 1.50 ± 0.28                         | 2.32 ± 0.43                         | t = 3.57, <b>p = 0.0096</b>  | 2.32 ± 0.52                     |
| Style Length (mm)        | 8.29 ± 1.17                         | 10.56 ± 0.87                        | t = 3.48, <b>p = 0.0095</b>  | 12.23 ± 0.36                    |
| Ovary Height (mm)        | 1.63 ± 0.12                         | 1.11 ± 0.05                         | t = -8.87, <b>p = 0.0003</b> | 1.32 ± 0.13                     |
| Ovary Width (mm)         | 1.05 ± 0.04                         | 0.92 ± 0.05                         | t = -4.68, <b>p = 0.002</b>  | 1.32 ± 0.05                     |
| Total Pollen             | 69.53 ± 192.8                       | 62.40 ± 731.3                       | t = -0.52; p = 0.3070        | NA                              |
| Proportion Viable Pollen | 0.469 ± 0.017                       | 0.834 ± 0.003                       | t = 5.70; <b>p = 0.0002</b>  | NA                              |

837  
838

839 **Table 2.** QTL associated with unilateral incompatibility, floral traits, and fertility traits. Percent  
 840 phenotypic variance (PVE) and percent parental difference (RHE) explained are reported for  
 841 each trait, with full models including all QTL found for each phenotype.  
 842  
 843

| Trait                      | LOD Threshold<br>alpha =<br>0.05 | QTL peak<br>chromosome,<br>position (cM),<br>closest marker | Peak<br>LOD | 1.5-LOD CI | PVE (%) | Additive<br>effect<br>(S.E.) | Dominance<br>effect (S.E.) | % parental<br>difference<br>explained<br>(RHE) |
|----------------------------|----------------------------------|-------------------------------------------------------------|-------------|------------|---------|------------------------------|----------------------------|------------------------------------------------|
| Unilateral Incompatibility | 2.71                             | 1, 60<br>chr1_79110602                                      | 5.49        | 40-64.67   | 32.63   | -0.066<br>(0.020)            | -0.062<br>(0.024)          | 23.0                                           |
| Corolla Diameter           | 2.19                             | None                                                        |             |            |         |                              |                            |                                                |
| Anther Length              | 2.85                             | None                                                        |             |            |         |                              |                            |                                                |
| Stigma Exsertion           | 2.32                             | 4, 180,<br>chr4_75727601                                    | 2.65        | 75-181.6   | 17      | 0.366<br>(0.082)             | 0.092<br>(0.110)           | 48.0                                           |
| Style Length               | 2.45                             | None                                                        |             |            |         |                              |                            |                                                |
| Ovary Width                | 2.44                             | None                                                        |             |            |         |                              |                            |                                                |
| Ovary Height               | 2.19                             | None                                                        |             |            |         |                              |                            |                                                |
| Total Pollen               | 2.25                             | None                                                        |             |            |         |                              |                            |                                                |
| Proportion Viable Pollen   | 2.12                             | None                                                        |             |            |         |                              |                            |                                                |
| Fruit Width                | 2.80                             | None                                                        |             |            |         |                              |                            |                                                |
| Fruit Height               | 2.46                             | 8, 10,<br>chr8_2708030                                      | 2.69        | 0-25       | 16.18   | -0.537<br>(0.149)            | 0.832<br>(0.271)           | 5.0                                            |
|                            |                                  | 9, 90,<br>chr9_5441571                                      | 2.68        | 62.19-100  | 6.17    | 0.535<br>(0.173)             | -0.047<br>(0.248)          | -5.0                                           |
| Fruit Weight               | 2.87                             | None                                                        |             |            |         |                              |                            |                                                |
| Seed Count                 | 2.55                             | None                                                        |             |            |         |                              |                            |                                                |

844  
 845

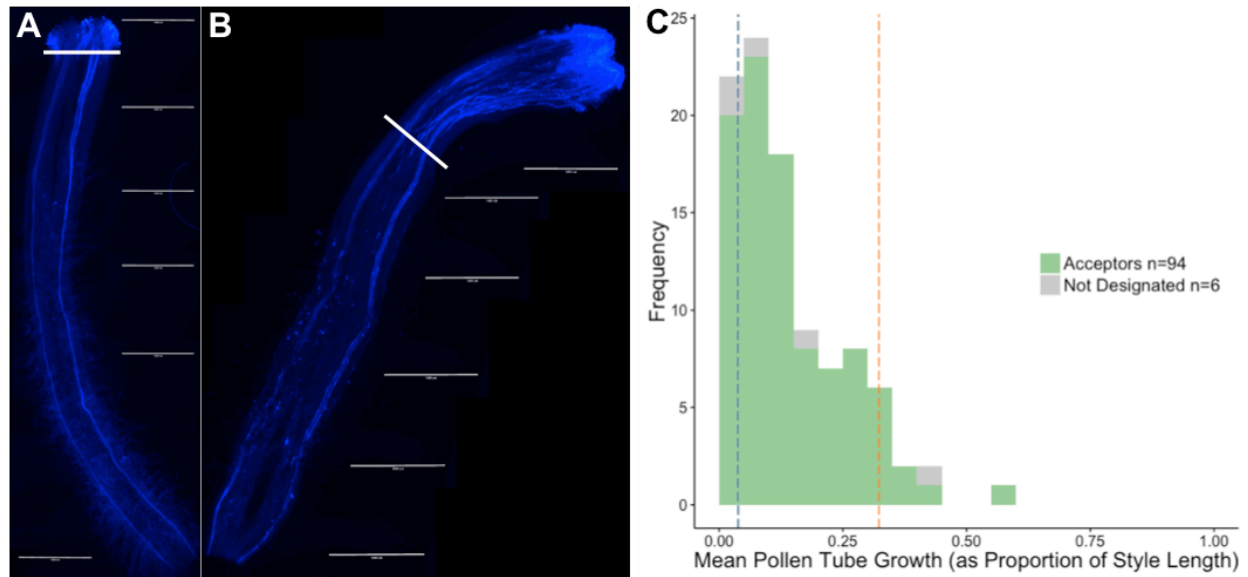

846  
847

848 **Figure 1.** Variation in the strength of unilateral incompatibility (UI) responses between *S.*  
849 *pennellii* populations. **A.** Representative image of an F<sub>2</sub> with a rapid UI response. **B.** Image of an  
850 F<sub>2</sub> with a less rapid UI response. **C.** Phenotypic distribution of unilateral incompatibility  
851 responses across the F<sub>2</sub> population. Blue dashed line (0.038) is the *S. pennellii* SI parent  
852 (LA3778); orange dashed line (0.32) is the *S. pennellii* SC parent (LA0716).

853  
854



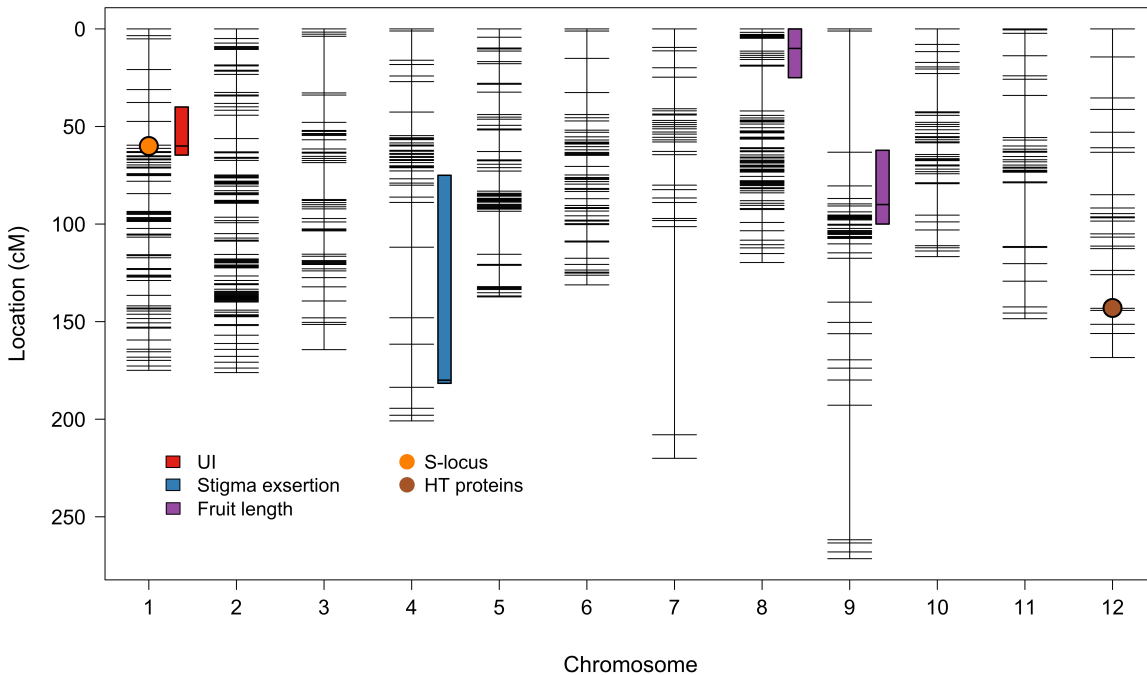

855  
856  
857  
858  
859  
860

**Figure 2.** Map of identified QTL. Each QTL is marked with the 1.5-LOD confidence interval, with the peak marker indicated by a horizontal line. A priori hypothesized loci are marked as ellipses.

861  
862  
863  
864  
865  
866  
867  
868  
869  
870  
871  
872  
873  
874  
875  
876  
877  
878  
879  
880  
881  
882  
883

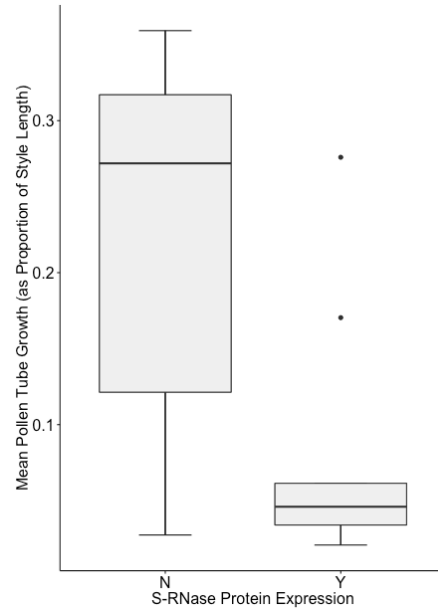

**Figure 3.** Expression of S-RNase in  $F_2$  mature styles as determined by a protein blot. There is significantly more rapid UI response in those styles that express S-RNase compared to those that do not ( $t= 3.374$ ,  $p = 0.003$ ).
